# Supplementary material for: An In Vitro Study on the Application of Silver-Doped Platelet-Rich Plasma in the Prevention of Post-Implant-Associated Infections
Source: MDPI journal article supplement (doi:10.3390/ijms25094842), 2024-04-29
Supplement: s1 [file s1]

## Supplementary Figures

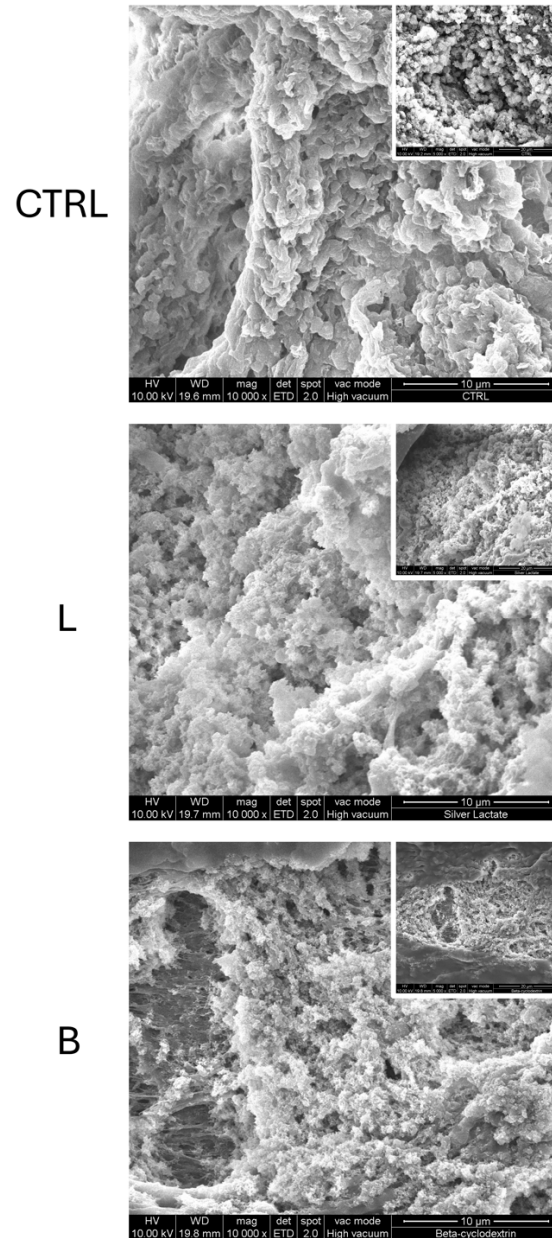

**Supplementary Figure S1. Microstructure of PRP and Ag-enriched PRP clusters.** CTRL: non-enriched PRP; L: Ag-enriched PRP with silver lactate; B: Ag-enriched PRP with silver deoxycholate:β-Cyclodextrin. Representative images were obtained by scanning electron microscopy in high-vacuum mode. Original magnification: 10000× (insets 5000×).

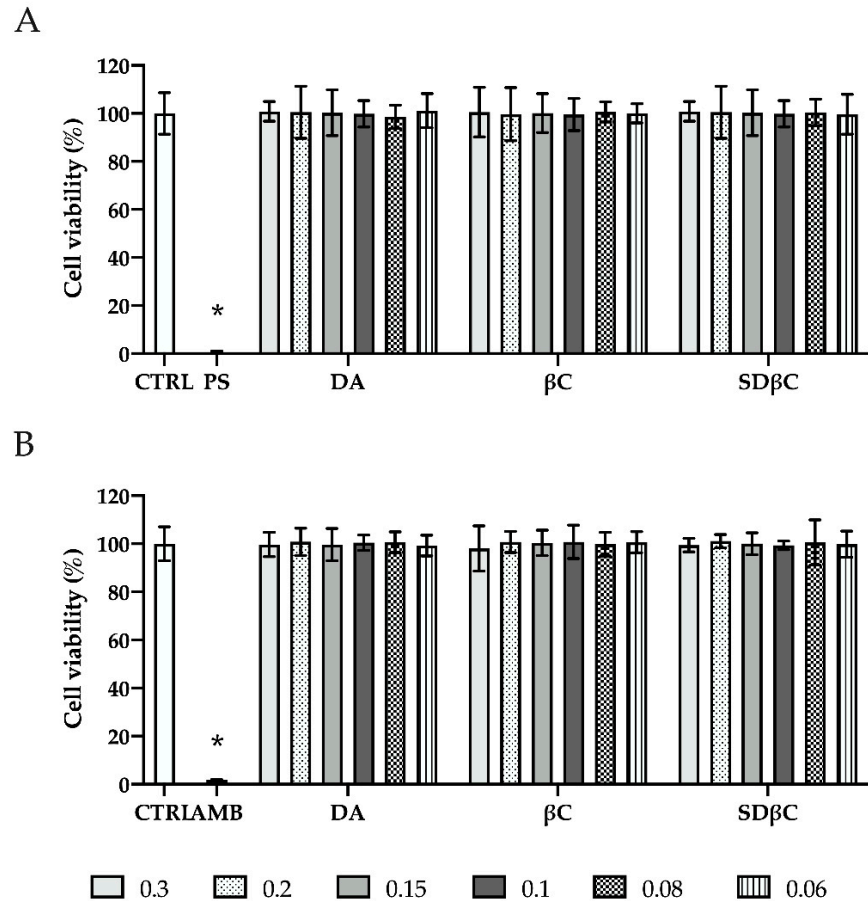

**Supplementary Figure S2. Effect of deoxycholic acid,  $\beta$ -cyclodextrin, sodium deoxycholate:  $\beta$ -cyclodextrin on viability of microbial planktonic cells.** The metabolic activity of *S. aureus* (A) and *C. albicans* (B) planktonic cells was evaluated after 24h of incubation through MTT assay. Data are expressed as percentage of cell viability, considering CTRL (positive control) as 100% vitality. Pen Strep (PS) or Amphotericin B (AMB) were used as negative controls. CTRL: not-treated microbial cells; PS: treatment with PS; AMB: treatment with AMB; DA: treatment with deoxycholic acid;  $\beta$ C: treatment with  $\beta$ -cyclodextrin; SD $\beta$ C: treatment with sodium deoxycholate:  $\beta$ -cyclodextrin. Error bars represent standard deviation, \* $p < 0.0001$  significantly different from CTRL.

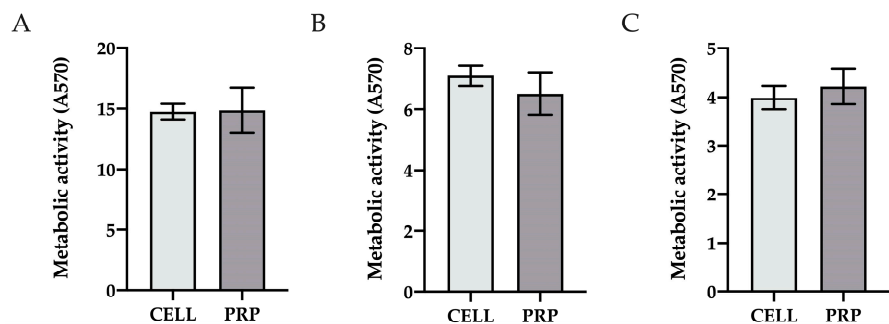

**Supplementary Figure S3. Effect of PRP on viability of microbial planktonic cells.** The metabolic activity of *S. aureus* (A), *S. epidermidis* (B) and *C. albicans* (C) planktonic cells was evaluated after 24h of incubation through MTT assay. Data are expressed as mean value of cell viability and error bars represent standard deviation. CELL: not-treated microbial cells; PRP: treatment with PRP.
